# Supplementary material for: Bismuth-Decorated Honeycomb-like Carbon Nanofibers: An Active Electrocatalyst for the Construction of a Sensitive Nitrite Sensor
Source: MDPI journal article supplement (doi:10.3390/molecules28093881), 2023-05-04
Supplement: s1 [file s1]

## Supplementary Material

# Bismuth Decorated Honeycomb-like Carbon Nanofibers: An Active Electrocatalyst for Construction of Sensitive Nitrite Sensor

Fengyi Wang <sup>1,2</sup>, Ye Li <sup>2</sup>, Chenglu Yan <sup>3</sup>, Qiuting Ma <sup>2</sup>, Xiaofeng Yang <sup>1,\*</sup>, Huaqiao Peng <sup>3</sup>, Huiyong Wang <sup>4</sup>, Juan Du <sup>2,\*</sup>, Baozhan Zheng <sup>2,\*</sup> and Yong Guo<sup>2</sup>

<sup>1</sup> Institute of Quality Standard and Testing Technology for Agro-products of Sichuan Academy of Agricultural Sciences, Chengdu 610066, China.

<sup>2</sup> College of Chemistry, Sichuan University, No. 29 Wangjiang Road, Chengdu 610064, China.

<sup>3</sup> The Second Research Institute of Civil Aviation Administration of China, Chengdu 610041, China.

<sup>4</sup> College of Chemistry and Chemical Engineering, Henan Normal University, Henan 453002, China.

\* Correspondence: yangxiaofeng\_cd@sina.com (X. Yang); dujuanchem@scu.edu.cn (J. Du); zhengbaozhan@scu.edu.cn (B. Zheng).

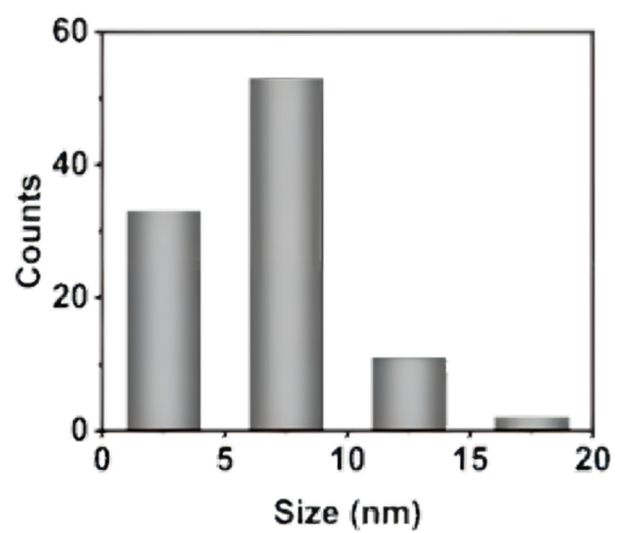

**Figure S1.** particle size distribution histograms of Bi NPs on the surface of HCNFs.

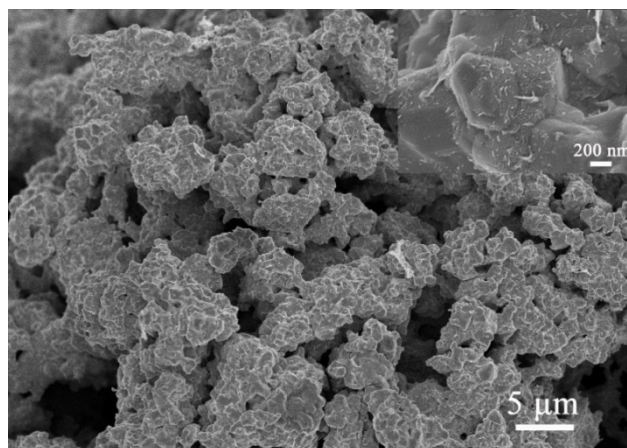

**Figure S2.** The SEM image of Bi NPs (inset of Figure S2 high magnification SEM image).

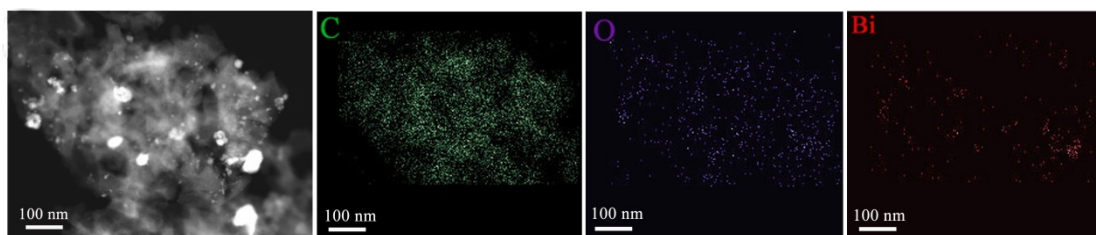

**Figure S3.** STEM image and corresponding elemental mapping images of Bi, C, O for Bi/HCNFs, respectively.

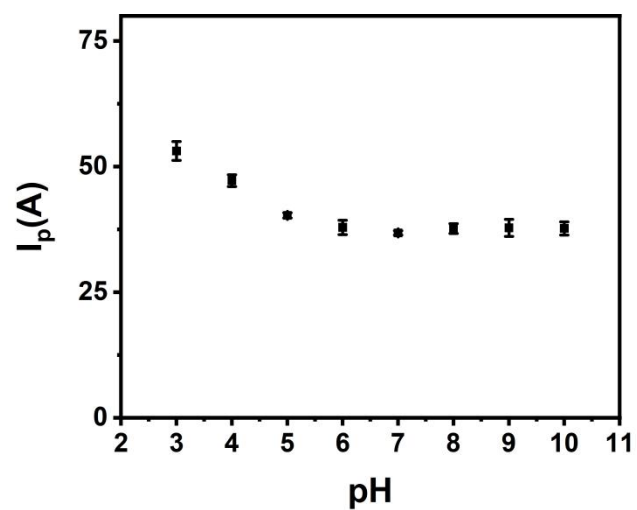

**Figure S4.** The diagram of CV peak current and pH in the presence of 1 mM  $\text{NO}_2^-$  ranging from 3.0 to 10.0.

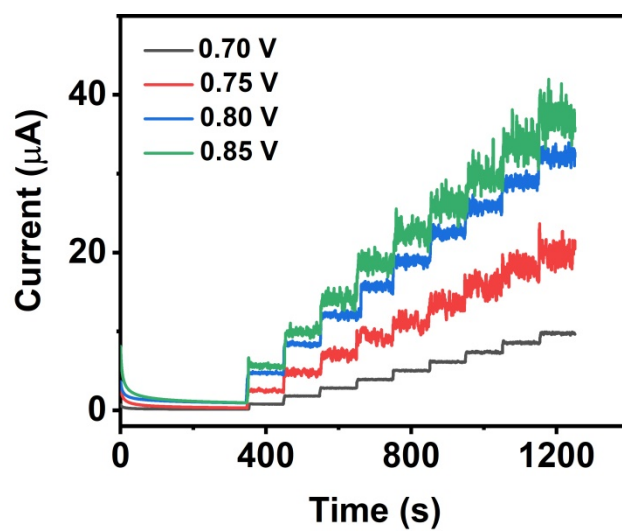

**Figure S5.** The amperometric responses of Bi/HCNFs at different potentials of 0.70-0.85 V vs. Ag/AgCl with successive additions of 0.2 mM nitrite.

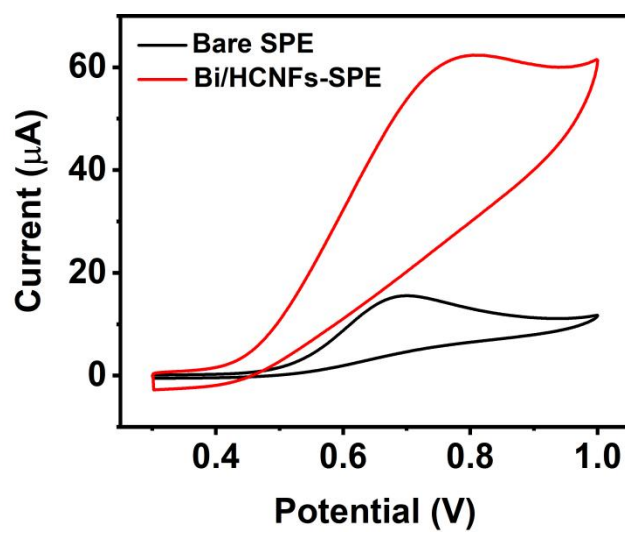

**Figure S6.** CV responses of disposable bare SPE and Bi/HCNFs modified SPE in 0.1 M PBS (pH 7.0) with the presence of 1 mM  $\text{NO}_2^-$ .

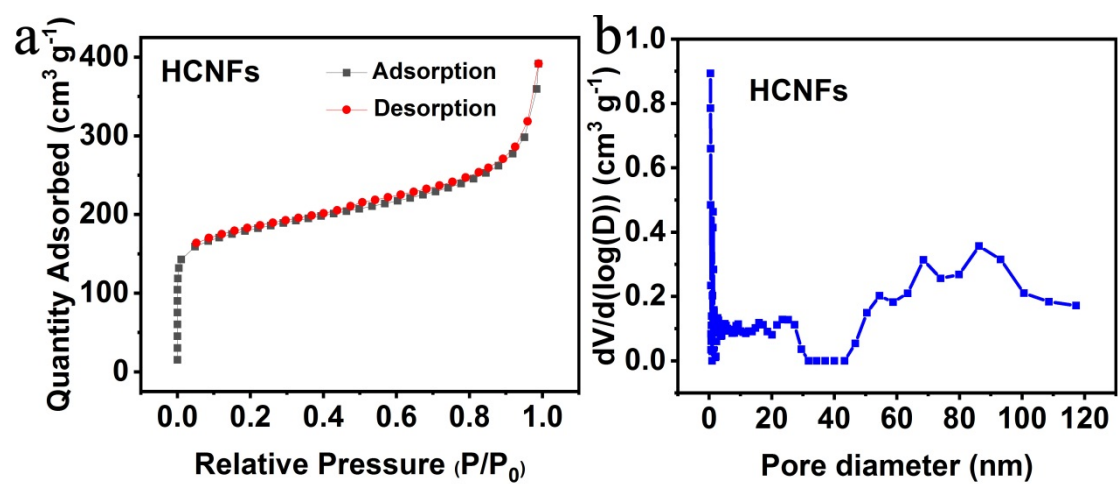

Figure S7. (a) Nitrogen adsorption-desorption isotherms of HCNFs and (b) its corresponding pore size distribution.



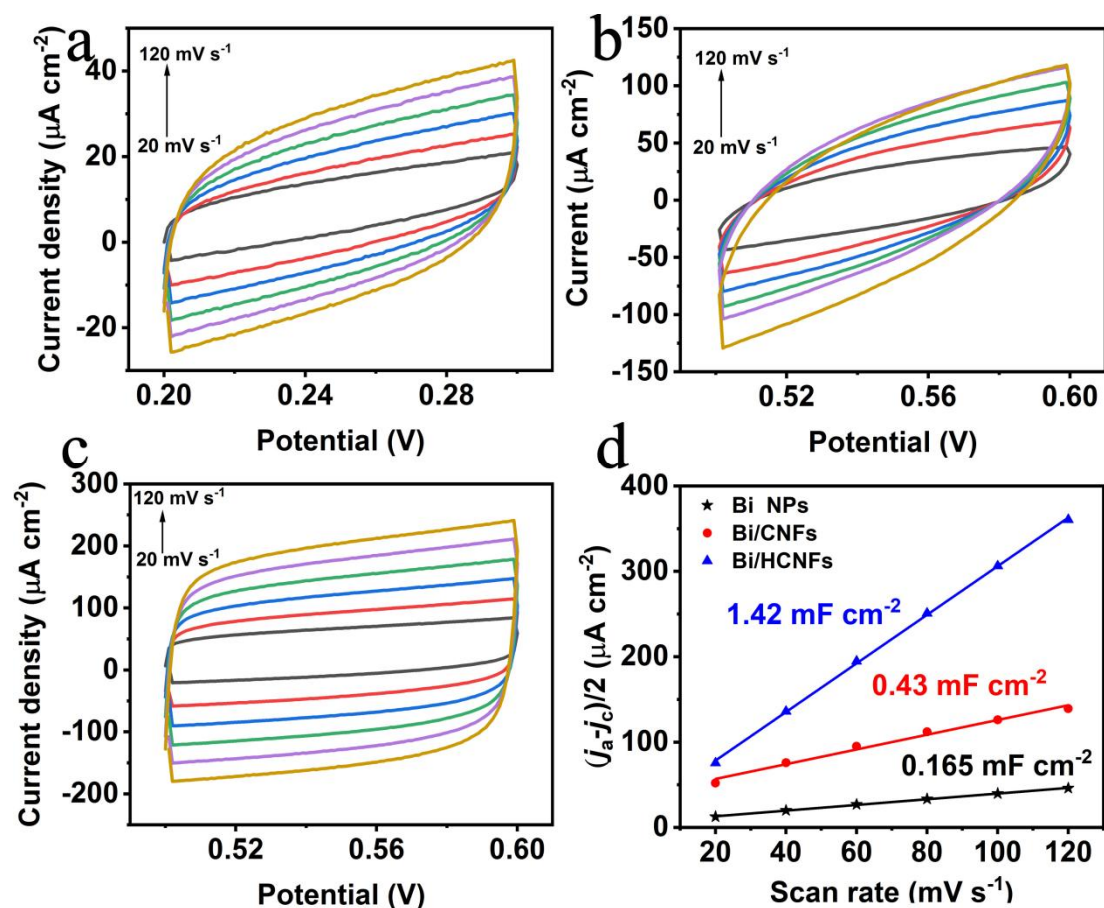

**Figure S8.** CV curves of Bi NPs (a), Bi/CNFs (b) and Bi/HCNFs (c) at different scan rates from 20 to 120  $\text{mV s}^{-1}$  in the region without faradaic current. (d) Plot of corresponding capacitive current densities of Bi NPs, Bi/CNFs and Bi/HCNFs with scan rates,  $j_a$  and  $j_c$  are the current densities of the anodic and cathodic branch of CV at a defined potential, respectively.

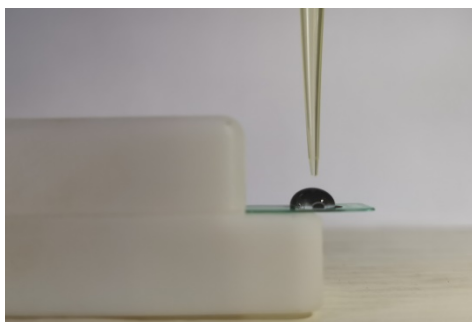

**Figure S9.** The photo of commercial screen-printed microelectrode with a drop of solution containing nitrite (200  $\mu$ L).

**Table S1.** Comparison of electrocatalytic performance toward nitrite with previous electrochemical sensors.

| Electrode materials                                    | LOD ( $\mu\text{M}$ ) | Sensitivity<br>( $\mu\text{A mM}^{-1}\text{cm}^{-2}$ ) | Reference |
|--------------------------------------------------------|-----------------------|--------------------------------------------------------|-----------|
| NiFe <sub>2</sub> O <sub>4</sub> NPs                   | 0.1236                | 7961.7                                                 | [1]       |
| NiFe-LDH NSAs/CC                                       | 0.02                  | 803.6                                                  | [2]       |
| Cu-MOF/Au                                              | 0.082                 | 252                                                    | [3]       |
| Ag/HNTs/MoS <sub>2</sub>                               | 0.7                   | 89.9 $\mu\text{A}/\text{mM}$                           | [4]       |
| SnO <sub>2</sub> /Pt/Ti/SiO <sub>2</sub>               | 1.7                   | 22.56 $\mu\text{A}/\text{mM}$                          | [5]       |
| $\alpha$ -Fe <sub>2</sub> O <sub>3</sub> /CNTs hybrids | 0.15                  | 334                                                    | [6]       |
| Fe <sub>3</sub> O <sub>4</sub> /rGO                    | 0.3                   | 226                                                    | [7]       |
| Cu/MWNTs                                               | 1.8                   | 455.84                                                 | [8]       |
| TMPyPcCo/aCNTs                                         | 0.071                 | 8 $\mu\text{A}/\text{mM}$                              | [9]       |
| Bi/HCNFs                                               | 0.019                 | 1269.9                                                 | This work |

**Table S2.** Analysis results of trace nitrite in real samples on Bi/HCNFs-SPE through dropping tests (200  $\mu\text{L}$ ).

| Samples   | Added ( $\mu\text{M}$ ) | Found ( $\mu\text{M}$ ) | Recovery (%) | <sup>a</sup> RSD(%) |
|-----------|-------------------------|-------------------------|--------------|---------------------|
| Tap water | 500                     | 526.8                   | 105.4        | 0.89                |
|           | 1000                    | 1038                    | 103.8        | 1.62                |
| Pickles   | 500                     | 514.7                   | 102.9        | 0.34                |
|           | 1000                    | 1059                    | 105.9        | 0.78                |
| Sausage   | 500                     | 515.3                   | 103.0        | 1.71                |
|           | 1000                    | 1053                    | 105.3        | 0.76                |

<sup>a</sup>RSD: Relative standard deviation.

## References

1. Nithyayini, K.N.; Harish, M.N.K.; Nagashree, K.L. Electrochemical detection of nitrite at NiFe<sub>2</sub>O<sub>4</sub> nanoparticles synthesised by solvent deficient method. *Electrochim. Acta* **2019**, *317*, 701–710.
2. Ma, Y.; Wang, Y.; Xie, D.; Gu, Y.; Zhang, H.; Wang, G.; Zhang, Y.; Zhao, H.; Wong, P.K. NiFe-layered double hydroxide nanosheet arrays supported on carbon cloth for highly sensitive detection of nitrite. *ACS Appl. Mater. Interfaces* **2018**, *10*, 6541–6551.
3. Chen, H.; Yang, T.; Liu, F.; Li, W. Electrodeposition of gold nanoparticles on Cu-based metal-organic framework for the electrochemical detection of nitrite. *Sens. Actuators B: Chem.* **2019**, *286*, 401–407.
4. Ghanei-Motlagh, M.; Taher, M.A. A novel electrochemical sensor based on silver/halloysite nanotube/molybdenum disulfide nanocomposite for efficient nitrite sensing. *Biosens. Bioelectron.* **2018**, *109*, 279–285.
5. Lete, C.; Chelu, M.; Marin, M.; Mihaiu, S.; Preda, S.; Anastasescu, M.; Calderón-Moreno, J.M.; Dinulescu, S.; Moldovan, C.; Gartner, M. Nitrite electrochemical sensing platform based on tin oxide films. *Sens. Actuators B: Chem.* **2020**, *316*, 128102.
6. Wang, K.; Wu, C.; Wang, F.; Liu, C.; Yu, C.; Jiang, G. In-situ insertion of carbon nanotubes into metal-organic frameworks-derived  $\alpha$ -Fe<sub>2</sub>O<sub>3</sub> polyhedrons for highly sensitive electrochemical detection of nitrite. *Electrochim. Acta* **2018**, *285*, 128–138.
7. Teymourian, H.; Salimi, A.; Khezrian, S. Fe<sub>3</sub>O<sub>4</sub> magnetic nanoparticles/reduced graphene oxide nanosheets as a novel electrochemical and bioelectrochemical sensing platform. *Biosens. Bioelectron.* **2013**, *49*, 1–8.
8. Manoj, D.; Saravanan, R.; Santhanalakshmi, J. Agarwal, S.V. Gupta, K.; Boukherroub, R. Towards green synthesis of monodisperse Cu nanoparticles: An efficient and high sensitive electrochemical nitrite sensor. *Sens. Actuators B: Chem.* **2018**, *266*, 873–882.
9. Zhang, J.; Zhang, Z.; Wu, H.; Wu, F.; He, C.; Wang, B.; Wu, Y.; Ren, Z. An electrochemical bifunctional sensor for the detection of nitrite and hydrogen peroxide based on layer-by-layer multilayer films of cationic phthalocyanine cobalt(II) and carbon nanotubes. *J. Mater. Chem. B* **2016**, *4*, 1310–1317.
